# Supplementary material
Source: PubMed Central journal article supplement (PMC4073996)
Supplement: pdf2.pdf [file pdf2.pdf]

## Supplementary File 4:

### GENES REGULATED IN SAME DIRECTION

| mgi_symbol    | mgi_description                                                                      | FOLD CHANGE  |                  |
|---------------|--------------------------------------------------------------------------------------|--------------|------------------|
|               |                                                                                      | KO versus WT | Old versus Young |
| Kcng4         | potassium voltage-gated channel, subfamily G, member 4                               | -1.922       | -1.361           |
| Glrx          | glutaredoxin                                                                         | -1.264       | -0.283           |
| Hsbp111       | heat shock factor binding protein 1-like 1                                           | -1.147       | -0.585           |
| 1810014F10Rik | RIKEN cDNA 1810014F10 gene                                                           | -1.099       | -0.348           |
| Fndc5         | fibronectin type III domain containing 5                                             | -1.030       | -0.793           |
| Tm6sf1        | transmembrane 6 superfamily member 1                                                 | -0.923       | -1.112           |
| Kcnn2         | K <sup>+</sup> intermediate/small conductanceCa <sup>++</sup> -activated channel, N2 | -0.877       | -0.507           |
| Pigy          | phosphatidylinositol glycan anchor biosynthesis, class Y                             | -0.745       | -0.246           |
| Ung           | uracil DNA glycosylase                                                               | -0.733       | -0.613           |
| Endog         | endonuclease G                                                                       | -0.702       | -0.436           |
| Tecta         | tectorin alpha                                                                       | -0.685       | -0.712           |
| ErbB3         | v-erb-b2 erythroblastic leukemia viral oncogene homolog 3 (avian)                    | -0.670       | -0.408           |
| Pdk2          | pyruvate dehydrogenase kinase, isoenzyme 2                                           | -0.599       | -0.289           |
| 2310061C15Rik | RIKEN cDNA 2310061C15 gene                                                           | -0.573       | -0.495           |
| Ngp           | neutrophilic granule protein                                                         | -0.569       | -0.269           |
| Fdx1          | ferredoxin 1                                                                         | -0.565       | -0.255           |
| Fam195a       | family with sequence similarity 195, member A                                        | -0.554       | -0.320           |
| Vav2          | vav 2 oncogene                                                                       | -0.544       | -0.630           |
| Alas1         | aminolevulinic acid synthase 1                                                       | -0.544       | -0.176           |
| Slc25a39      | solute carrier family 25, member 39                                                  | -0.537       | -0.449           |
| Mrpl12        | mitochondrial ribosomal protein L12                                                  | -0.531       | -0.333           |
| Nrtn          | neurturin                                                                            | -0.529       | -0.502           |
| Spsb4         | splA/ryanodine receptor domain and SOCS box containing 4                             | -0.526       | -0.676           |
| Mrpl47        | mitochondrial ribosomal protein L47                                                  | -0.525       | -0.437           |
| Zfp827        | zinc finger protein 827                                                              | -0.524       | -0.274           |
| Aifm1         | apoptosis-inducing factor, mitochondrion-associated 1                                | -0.476       | -0.180           |
| Uqcrl10       | ubiquinol-cytochrome c reductase, complex III subunit X                              | -0.474       | -0.418           |
| Sox5          | SRY-box containing gene 5                                                            | -0.469       | -0.336           |
| Mut           | methylmalonyl-Coenzyme A mutase                                                      | -0.462       | -0.270           |
| Ndufa11       | NADH dehydrogenase (ubiquinone) 1 alpha subcomplex 11                                | -0.454       | -0.230           |
| Cldn18        | claudin 18                                                                           | -0.450       | -0.267           |
| Cox10         | COX10 homolog, cytochrome c oxidase assembly, heme A: farnesyltransferase (yeast)    | -0.450       | -0.246           |
| Ptges2        | prostaglandin E synthase 2                                                           | -0.450       | -0.155           |

|               |                                                                                      |        |        |
|---------------|--------------------------------------------------------------------------------------|--------|--------|
| Gbp1          | guanylate binding protein 1                                                          | -0.441 | -0.317 |
| Dnajc6        | DnaJ (Hsp40) homolog, subfamily C, member 6                                          | -0.437 | -0.250 |
| Timm44        | translocase of inner mitochondrial membrane 44                                       | -0.429 | -0.376 |
| D10Jhu81e     | DNA segment, Chr 10, Johns Hopkins University 81 expressed                           | -0.424 | -0.236 |
| Ndufaf4       | NADH dehydrogenase (ubiquinone) 1 alpha subcomplex, assembly factor 4                | -0.404 | -0.419 |
| Paqr4         | progesterone and adipoQ receptor family member IV                                    | -0.404 | -0.547 |
| Acads         | acyl-Coenzyme A dehydrogenase, short chain                                           | -0.395 | -0.440 |
| Krt12         | keratin 12                                                                           | -0.394 | -0.252 |
| Brp44         | brain protein 44                                                                     | -0.387 | -0.171 |
| Ushbp1        | Usher syndrome 1C binding protein 1                                                  | -0.384 | -0.344 |
| Mrpl34        | mitochondrial ribosomal protein L34                                                  | -0.357 | -0.227 |
| Leng1         | leukocyte receptor cluster (LRC) member 1                                            | -0.356 | -0.318 |
| Hmgcs1        | 3-hydroxy-3-methylglutaryl-Coenzyme A synthase 1                                     | -0.355 | -0.482 |
| Glud1         | glutamate dehydrogenase 1                                                            | -0.349 | -0.410 |
| Ncapd2        | non-SMC condensin I complex, subunit D2                                              | -0.346 | -0.192 |
| Inpp1         | inositol polyphosphate-1-phosphatase                                                 | -0.344 | -0.394 |
| Atp5j2        | ATP synthase, H <sup>+</sup> transporting, mitochondrial F0 complex, subunit F2      | -0.340 | -0.135 |
| Lpgat1        | lysophosphatidylglycerol acyltransferase 1                                           | -0.337 | -0.250 |
| Ak3           | adenylate kinase 3                                                                   | -0.333 | -0.737 |
| 1110017D15Rik | RIKEN cDNA 1110017D15 gene                                                           | -0.321 | -0.229 |
| Efna2         | ephrin A2                                                                            | -0.320 | -0.352 |
| Fam82b        | family with sequence similarity 82, member B                                         | -0.307 | -0.344 |
| Uqcrc         | ubiquinol-cytochrome c reductase, complex III subunit VII                            | -0.306 | -0.186 |
| Ndufb11       | NADH dehydrogenase (ubiquinone) 1 beta subcomplex, 11                                | -0.305 | -0.190 |
| Dnase2a       | deoxyribonuclease II alpha                                                           | -0.305 | -0.225 |
| Atp5e         | ATP synthase, H <sup>+</sup> transporting, mitochondrial F1 complex, epsilon subunit | -0.302 | -0.257 |
| Epdr1         | ependymin related protein 1 (zebrafish)                                              | -0.302 | -0.389 |
| Pcyt2         | phosphate cytidyltransferase 2, ethanolamine                                         | -0.301 | -0.248 |
| Sidt1         | SID1 transmembrane family, member 1                                                  | -0.299 | -0.182 |
| Cep68         | centrosomal protein 68                                                               | -0.296 | -0.529 |
| Ap1g2         | adaptor protein complex AP-1, gamma 2 subunit                                        | -0.294 | -0.248 |
| Fam115c       | family with sequence similarity 115, member C                                        | -0.291 | -0.290 |
| Cox4i1        | cytochrome c oxidase subunit IV isoform 1                                            | -0.290 | -0.132 |
| Trpt1         | tRNA phosphotransferase 1                                                            | -0.286 | -0.255 |
| C1qbp         | complement component 1, q subcomponent binding protein                               | -0.278 | -0.162 |
| Aph1a         | anterior pharynx defective 1a homolog (C. elegans)                                   | -0.278 | -0.421 |
| Psg16         | pregnancy specific glycoprotein 16                                                   | -0.263 | -0.140 |
| Csrnp3        | cysteine-serine-rich nuclear protein 3                                               | -0.260 | -0.212 |

|               |                                                                  |        |        |
|---------------|------------------------------------------------------------------|--------|--------|
| Naa20         | N(alpha)-acetyltransferase 20, NatB catalytic subunit            | -0.246 | -0.231 |
| Cybas3        | cytochrome b, ascorbate dependent 3                              | -0.240 | -0.304 |
| Gcnt3         | glucosaminyl (N-acetyl) transferase 3, mucin type                | -0.235 | -0.281 |
| Mrrf          | mitochondrial ribosome recycling factor                          | -0.230 | -0.134 |
| Cox6b1        | cytochrome c oxidase, subunit VIb polypeptide 1                  | -0.227 | -0.161 |
| 3110056O03Rik | RIKEN cDNA 3110056O03 gene                                       | -0.226 | -0.192 |
| Rps6ka2       | ribosomal protein S6 kinase, polypeptide 2                       | -0.221 | -0.308 |
| Aars2         | alanyl-tRNA synthetase 2, mitochondrial (putative)               | -0.213 | -0.131 |
| Mrpl20        | mitochondrial ribosomal protein L20                              | -0.204 | -0.179 |
| Tdp2          | tyrosyl-DNA phosphodiesterase 2                                  | -0.198 | -0.259 |
| Hdhd1a        | haloacid dehalogenase-like hydrolase domain containing 1A        | -0.159 | -0.176 |
| Ndufa1        | NADH dehydrogenase (ubiquinone) 1 alpha subcomplex, 1            | -0.146 | -0.224 |
| Ift52         | intraflagellar transport 52 homolog (Chlamydomonas)              | 0.128  | 0.129  |
| Fxr1          | fragile X mental retardation gene 1, autosomal homolog           | 0.155  | 0.141  |
| Akr1a1        | aldo-keto reductase family 1, member A1 (aldehyde reductase)     | 0.156  | 0.207  |
| Gmppa         | GDP-mannose pyrophosphorylase A                                  | 0.186  | 0.419  |
| Sar1a         | SAR1 gene homolog A (S. cerevisiae)                              | 0.187  | 0.228  |
| Cd164         | CD164 antigen                                                    | 0.193  | 0.216  |
| Frg1          | FSHD region gene 1                                               | 0.202  | 0.198  |
| Celf5         | CUGBP, Elav-like family member 5                                 | 0.203  | 0.202  |
| Smyd2         | SET and MYND domain containing 2                                 | 0.207  | 0.425  |
| P4hb          | prolyl 4-hydroxylase, beta polypeptide                           | 0.208  | 0.526  |
| Cfl2          | cofilin 2, muscle                                                | 0.210  | 0.386  |
| Usp47         | ubiquitin specific peptidase 47                                  | 0.211  | 0.326  |
| Ptpn4         | protein tyrosine phosphatase, non-receptor type 4                | 0.217  | 0.234  |
| Daf2          | decay accelerating factor 2                                      | 0.218  | 0.225  |
| Skp1a         | S-phase kinase-associated protein 1A                             | 0.222  | 0.251  |
| Copg          | coatamer protein complex, subunit gamma                          | 0.225  | 0.233  |
| Anp32e        | acidic (leucine-rich) nuclear phosphoprotein 32 family, member E | 0.226  | 0.563  |
| Apex1         | apurinic/aprimidinic endonuclease 1                              | 0.230  | 0.325  |
| Bcap31        | B cell receptor associated protein 31                            | 0.236  | 0.172  |
| Zwilch        | Zwilch, kinetochore associated, homolog (Drosophila)             | 0.244  | 0.301  |
| Zfp623        | zinc finger protein 623                                          | 0.249  | 0.182  |
| D11Wsu99e     | DNA segment, Chr 11, Wayne State University 99, expressed        | 0.250  | 0.164  |
| Senp5         | SUMO/sentrin specific peptidase 5                                | 0.261  | 0.363  |
| Zfp828        | zinc finger protein 828                                          | 0.262  | 0.144  |
| Tbcb          | tubulin folding cofactor B                                       | 0.262  | 0.373  |
| Atp6v1g1      | ATPase, H+ transporting, lysosomal V1 subunit G1                 | 0.266  | 0.100  |

|           |                                                                    |       |       |
|-----------|--------------------------------------------------------------------|-------|-------|
| Tbcd      | tubulin-specific chaperone d                                       | 0.274 | 0.470 |
| Pyroxd1   | pyridine nucleotide-disulphide oxidoreductase domain 1             | 0.274 | 0.367 |
| Suz12     | suppressor of zeste 12 homolog (Drosophila)                        | 0.276 | 0.193 |
| St7l      | suppression of tumorigenicity 7-like                               | 0.287 | 0.274 |
| Egf       | epidermal growth factor                                            | 0.296 | 0.524 |
| Zc3h15    | zinc finger CCCH-type containing 15                                | 0.299 | 0.382 |
| Nagk      | N-acetylglucosamine kinase                                         | 0.317 | 0.317 |
| Serpinb6a | serine (or cysteine) peptidase inhibitor, clade B, member 6a       | 0.318 | 0.293 |
| Sbno1     | sno, strawberry notch homolog 1 (Drosophila)                       | 0.319 | 0.270 |
| Cand2     | cullin-associated and neddylation-dissociated 2 (putative)         | 0.331 | 0.303 |
| Ifi271l   | interferon, alpha-inducible protein 27 like 1                      | 0.337 | 0.734 |
| Scd3      | stearoyl-coenzyme A desaturase 3                                   | 0.338 | 0.345 |
| Ppap2a    | phosphatidic acid phosphatase type 2A                              | 0.341 | 0.523 |
| Vps37c    | vacuolar protein sorting 37C (yeast)                               | 0.344 | 0.158 |
| Nedd4     | neural precursor cell expressed, developmentally down-regulated 4  | 0.348 | 0.660 |
| Ankle2    | ankyrin repeat and LEM domain containing 2                         | 0.360 | 0.637 |
| Phf20     | PHD finger protein 20                                              | 0.371 | 0.320 |
| Vezt      | vezatin, adherens junctions transmembrane protein                  | 0.374 | 0.732 |
| Pafah1b2  | platelet-activating factor acetylhydrolase, isoform 1b, subunit 2  | 0.376 | 0.631 |
| St13      | suppression of tumorigenicity 13                                   | 0.377 | 0.261 |
| Dtna      | dystrobrevin alpha                                                 | 0.385 | 0.436 |
| Heatr6    | HEAT repeat containing 6                                           | 0.392 | 0.383 |
| Taf4b     | TAF4B RNA polymerase II, TATA box binding, (TBP)-associated factor | 0.397 | 0.291 |
| Btbd9     | BTB (POZ) domain containing 9                                      | 0.407 | 0.465 |
| Utp6      | UTP6, small subunit (SSU) processome component, homolog (yeast)    | 0.411 | 0.439 |
| Uevld     | UEV and lactate/malate dehydrogenase domains                       | 0.415 | 0.431 |
| Lsm10     | U7 snRNP-specific Sm-like protein LSM10                            | 0.425 | 0.333 |
| Twsg1     | twisted gastrulation homolog 1 (Drosophila)                        | 0.435 | 0.684 |
| Der1      | Der1-like domain family, member 1                                  | 0.438 | 0.594 |
| Psm10     | proteasome (prosome, macropain) 26S subunit, non-ATPase, 10        | 0.444 | 0.337 |
| Hn1       | hematological and neurological expressed sequence 1                | 0.456 | 0.629 |
| Yap1      | yes-associated protein 1                                           | 0.461 | 0.459 |
| Tdrd7     | tudor domain containing 7                                          | 0.475 | 0.339 |
| Srpk3     | serine/arginine-rich protein specific kinase 3                     | 0.477 | 0.397 |
| Slk       | STE20-like kinase (yeast)                                          | 0.495 | 0.532 |
| Chrna1    | cholinergic receptor, nicotinic, alpha polypeptide 1 (muscle)      | 0.506 | 1.096 |
| Lonrf1    | LON peptidase N-terminal domain and ring finger 1                  | 0.509 | 0.592 |
| Fam48a    | family with sequence similarity 48, member A                       | 0.512 | 0.249 |

|               |                                                                  |
|---------------|------------------------------------------------------------------|
| Trp53         | transformation related protein 53                                |
| Mdm4          | transformed mouse 3T3 cell double minute 4                       |
| Mtap1b        | microtubule-associated protein 1B                                |
| Cpd           | carboxypeptidase D                                               |
| Chrnbl        | cholinergic receptor, nicotinic, beta polypeptide 1 (muscle)     |
| 2010106G01Rik | RIKEN cDNA 2010106G01 gene                                       |
| Spg20         | spastic paraplegia 20, spartin (Troyer syndrome) homolog (human) |
| Relb          | avian reticuloendotheliosis viral (v-rel) oncogene related B     |
| Wls           | wntless homolog (Drosophila)                                     |
| Sel1l         | sel-1 suppressor of lin-12-like (C. elegans)                     |
| Rai14         | retinoic acid induced 14                                         |
| Lrp11         | low density lipoprotein receptor-related protein 11              |
| Fbxo17        | F-box protein 17                                                 |
| R3hdm1        | R3H domain 1 (binds single-stranded nucleic acids)               |
| Chchd6        | coiled-coil-helix-coiled-coil-helix domain containing 6          |
| Tph1          | tryptophan hydroxylase 1                                         |
| Cpne2         | copine II                                                        |
| Snopc3        | small nuclear RNA activating complex, polypeptide 3              |

|       |       |
|-------|-------|
| 0.515 | 0.758 |
| 0.517 | 0.393 |
| 0.546 | 1.150 |
| 0.548 | 1.141 |
| 0.549 | 0.588 |
| 0.550 | 0.218 |
| 0.585 | 0.441 |
| 0.600 | 0.402 |
| 0.604 | 0.603 |
| 0.651 | 0.437 |
| 0.664 | 1.417 |
| 0.702 | 0.860 |
| 0.714 | 0.441 |
| 0.719 | 0.591 |
| 0.767 | 0.627 |
| 0.970 | 0.509 |
| 1.040 | 2.847 |
| 1.244 | 1.212 |

Total genes: 165

## GENES REGULATED IN OPPOSITE DIRECTION

| <a href="#">mgi_symbol</a> | <a href="#">mgi_description</a>                              |
|----------------------------|--------------------------------------------------------------|
| Pdha1                      | pyruvate dehydrogenase E1 alpha 1                            |
| Gca                        | grancalcin                                                   |
| Apol6                      | apolipoprotein L 6                                           |
| Sh2d4a                     | SH2 domain containing 4A                                     |
| 1300010F03Rik              | RIKEN cDNA 1300010F03 gene                                   |
| Idh3g                      | isocitrate dehydrogenase 3 (NAD+), gamma                     |
| Prdx5                      | peroxiredoxin 5                                              |
| Iscu                       | IscU iron-sulfur cluster scaffold homolog (E. coli)          |
| Trap1                      | TNF receptor-associated protein 1                            |
| Ciapin1                    | cytokine induced apoptosis inhibitor 1                       |
| Gsto1                      | glutathione S-transferase omega 1                            |
| Eci1                       | enoyl-Coenzyme A delta isomerase 1                           |
| Nudt13                     | nudix (nucleoside diphosphate linked moiety X)-type motif 13 |

| <a href="#">KO versus WT</a> | <a href="#">Old versus Young</a> |
|------------------------------|----------------------------------|
| -0.508                       | 0.323                            |
| -0.484                       | 0.937                            |
| -0.417                       | 0.333                            |
| -0.394                       | 0.478                            |
| -0.377                       | 0.373                            |
| -0.370                       | 0.169                            |
| -0.357                       | 0.474                            |
| -0.356                       | 0.199                            |
| -0.308                       | 0.340                            |
| -0.270                       | 0.183                            |
| -0.248                       | 0.205                            |
| -0.240                       | 0.163                            |
| -0.239                       | 0.243                            |

|               |                                                                       |        |        |
|---------------|-----------------------------------------------------------------------|--------|--------|
| Mrps31        | mitochondrial ribosomal protein S31                                   | -0.223 | 0.076  |
| Ces4a         | carboxylesterase 4A                                                   | -0.206 | 0.111  |
| Poldip2       | polymerase (DNA-directed), delta interacting protein 2                | -0.202 | 0.099  |
| Srsf11        | serine/arginine-rich splicing factor 11                               | -0.191 | 0.190  |
| Hmgcl         | 3-hydroxy-3-methylglutaryl-Coenzyme A lyase                           | -0.140 | 0.144  |
| Csnk1a1       | casein kinase 1, alpha 1                                              | 0.146  | -0.265 |
| B3gnt1        | UDP-GlcNAc:betaGal beta-1,3-N-acetylglucosaminyltransferase 1         | 0.154  | -0.160 |
| H2afx         | H2A histone family, member X                                          | 0.220  | -0.302 |
| Mapk1         | mitogen-activated protein kinase 1                                    | 0.221  | -0.590 |
| Rdx           | radixin                                                               | 0.252  | -0.586 |
| Fam167a       | family with sequence similarity 167, member A                         | 0.270  | -0.216 |
| Gpx7          | glutathione peroxidase 7                                              | 0.275  | -0.517 |
| Smurf2        | SMAD specific E3 ubiquitin protein ligase 2                           | 0.279  | -0.560 |
| Nck2          | non-catalytic region of tyrosine kinase adaptor protein 2             | 0.285  | -0.184 |
| Nup153        | nucleoporin 153                                                       | 0.295  | -0.191 |
| Zfp532        | zinc finger protein 532                                               | 0.302  | -0.241 |
| Mapt          | microtubule-associated protein tau                                    | 0.315  | -0.194 |
| Gm266         | predicted gene 266                                                    | 0.322  | -0.278 |
| Cpeb3         | cytoplasmic polyadenylation element binding protein 3                 | 0.349  | -0.148 |
| Rell1         | RELT-like 1                                                           | 0.354  | -0.385 |
| E2f3          | E2F transcription factor 3                                            | 0.375  | -0.385 |
| Ttyh2         | tweety homolog 2 (Drosophila)                                         | 0.383  | -0.417 |
| Atp7a         | ATPase, Cu <sup>++</sup> transporting, alpha polypeptide              | 0.391  | -0.296 |
| Ccnk          | cyclin K                                                              | 0.427  | -0.303 |
| Afap111       | actin filament associated protein 1-like 1                            | 0.434  | -0.328 |
| 2210011C24Rik | RIKEN cDNA 2210011C24 gene                                            | 0.435  | -0.482 |
| Adamts3       | disintegrin-like and metallopeptidase, thrombospondin type 1 motif, 3 | 0.499  | -0.934 |
| Tceal8        | transcription elongation factor A (SII)-like 8                        | 0.647  | -1.186 |

Total genes: 41
