# Supplementary material
Source: PubMed Central journal article supplement (PMC4073996)
Supplement: tableS1.pdf [file tableS1.pdf]

**Table S1:** RT-PCR and Genotyping primers

All primers are listed in 5' to 3' direction.

| <b>GENE</b>                     | <b>FORWARD PRIMER</b>    | <b>REVERSE PRIMER</b>     |
|---------------------------------|--------------------------|---------------------------|
| <i>Pgc-1<math>\alpha</math></i> | AGCCGTGACCACTGACAACGAG   | GCTGCATGGTTCTGAGTGCTAAG   |
| <i>Pgc-1<math>\beta</math></i>  | AGTCAGCGGCCTTGTGTCAA     | ACTCTGGGACAGGGCAGCA       |
| <i>Atp5b</i>                    | CACCAAGAAGGGATCGATCAC    | CAGGTCATCAGCAGGCACAT      |
| <i>Err<math>\alpha</math></i>   | CGGTGTGGCATCCTGTGA       | CTCCCCTGGATGGTCCTCTT      |
| <i>Cox5b</i>                    | GCTGCATCTGTGAAGAGGACAAC  | CAGCTTGTAATGGGTTCACAGT    |
| <i>Tfam</i>                     | GGTATGGAGAAGGAGGCCCGG    | CGAATCATCCTTTGCCTCCTGGAA  |
| <i>Glut1</i>                    | CGAGGGACAGCCGATGTG       | TGCCGACCCTCTTCTTTTCAT     |
| <i>Glut4</i>                    | CATGGCTGTCGCTGGTTTC      | AAACCCATGCCGACAATGA       |
| <i>Cytoc</i>                    | GCAAGCATAAGACTGGACAAA    | TGTTGGCATCTGTGTAAGAGAATC  |
| <i>Sod2</i>                     | GGCCAAGGAGATGTTACAAC     | GCAACTCTCCTTTGGGTCTC      |
| <i>MyHC-I</i>                   | CCTTGGCACCAATGTCCCGGCTC  | GAAGCGCAATGCAGAGTCGGTG    |
| <i>MyHC-IIa</i>                 | ATGAGCTCCGACGCCGAG       | TCTGTTAGCATGAACTGGTAGGCG  |
| <i>MyHC-IIx</i>                 | AAGGAGCAGGACACCAGCGCCCA  | ATCTCTTTGGTCACTTTCTGCT    |
| <i>MyHC-IIb</i>                 | GTGATTTCTCCTGTCACCTCTC   | GGAGGACCGCAAGAACGTGCTGA   |
| <i>Hif2<math>\alpha</math></i>  | CTGAGGAAGGAGAAATCCCGT    | TGTGTCCGAAGGAAGCTGATG     |
| <i>Cd68</i>                     | TTCTCCAGCTGTTACCTTGACCT  | GTTGCAAGAGAAACATGGCCCCGAA |
| <i>Il-6</i>                     | ATCCAGTTGCCTTCTTGGGACTGA | TAAGCCTCCGACTTGTGAAGTGGT  |
| <i>Mcp-1</i>                    | TCACCTGCTGCTACTCATTACCA  | TACAGCTTCTTTGGGACACCTGCT  |
| <i>Tnf<math>\alpha</math></i>   | CCCTCACACTCAGATCATCTTCT  | GCTACGACGTGGGCTACAG       |
| <i>Idh</i>                      | GCATTGCAGAGTTTGCTTCGAGT  | GTTCTCCGCAACTTCCCTGCATTT  |
| <i>Socs1</i>                    | AGTCGCCAACGGAAGTCTTCTT   | ACGTAGTGCTCCAGCAGCTCGAAA  |
| <i>Socs3</i>                    | ACCAAGAACCTACGCATCCAGTGT | CACCAGCTTGAGTACACAGTCGAA  |
| <i>mtNdl</i>                    | GTCCATACGGCATCCTACAACCAT | TGTGAGTGATAGGGTGGGTGCAAT  |
| <i>mtAtp6</i>                   | ATGGCATTAGCAGTCCGGCTTACA | TGTAATGGTAGCTGTTGGTGGGCT  |

---

**Genotyping**

*LoxP*            TCCAGTAGGCAGAGATTTATGAC            TGTCTGGTTTGACAATCTGCTAGGT

*Myogenin-cre*    ACTGGAAACGTCTTGATGTG            GTGAAACAGCATTGCTGCTCACT

---
